# Supplementary material for: A Genome-Wide Association Study of Nephrolithiasis in the Japanese Population Identifies Novel Susceptible Loci at 5q35.3, 7p14.3, and 13q14.1
Source: PubMed Central journal article supplement (PMC3291538; doi:10.1371/journal.pgen.1002541), 2012-03-01

# Supplementary Figure 4

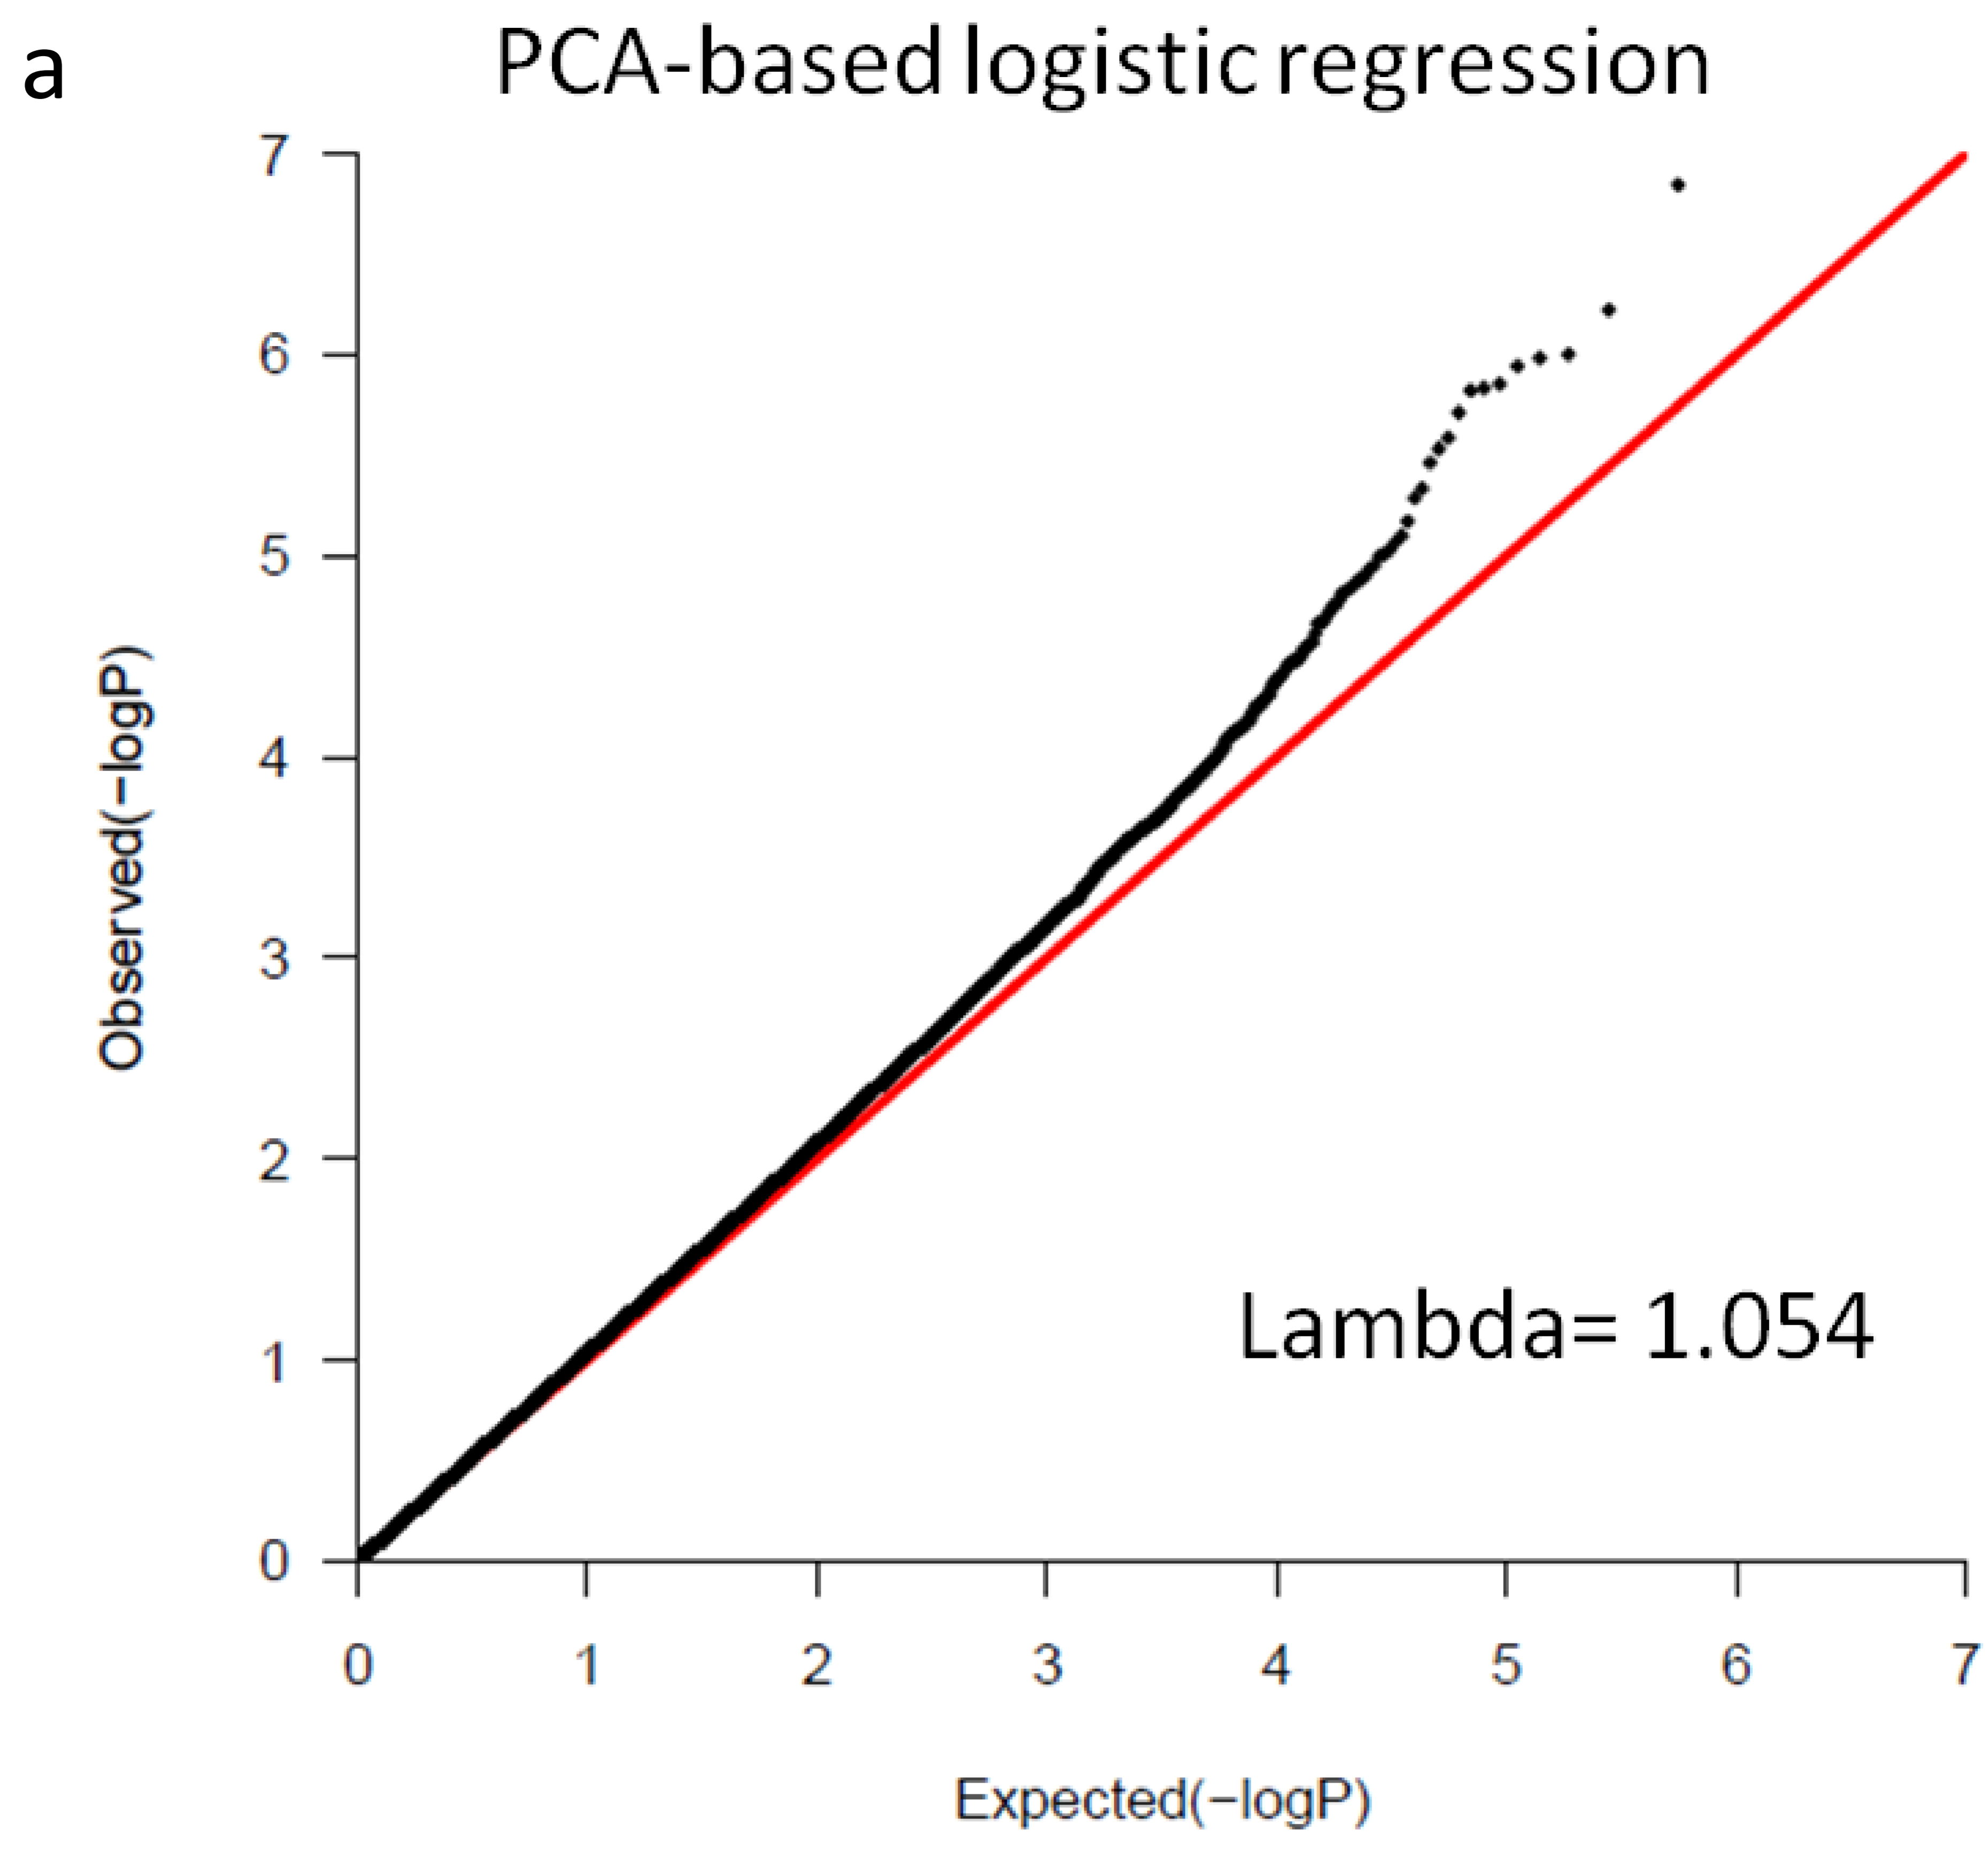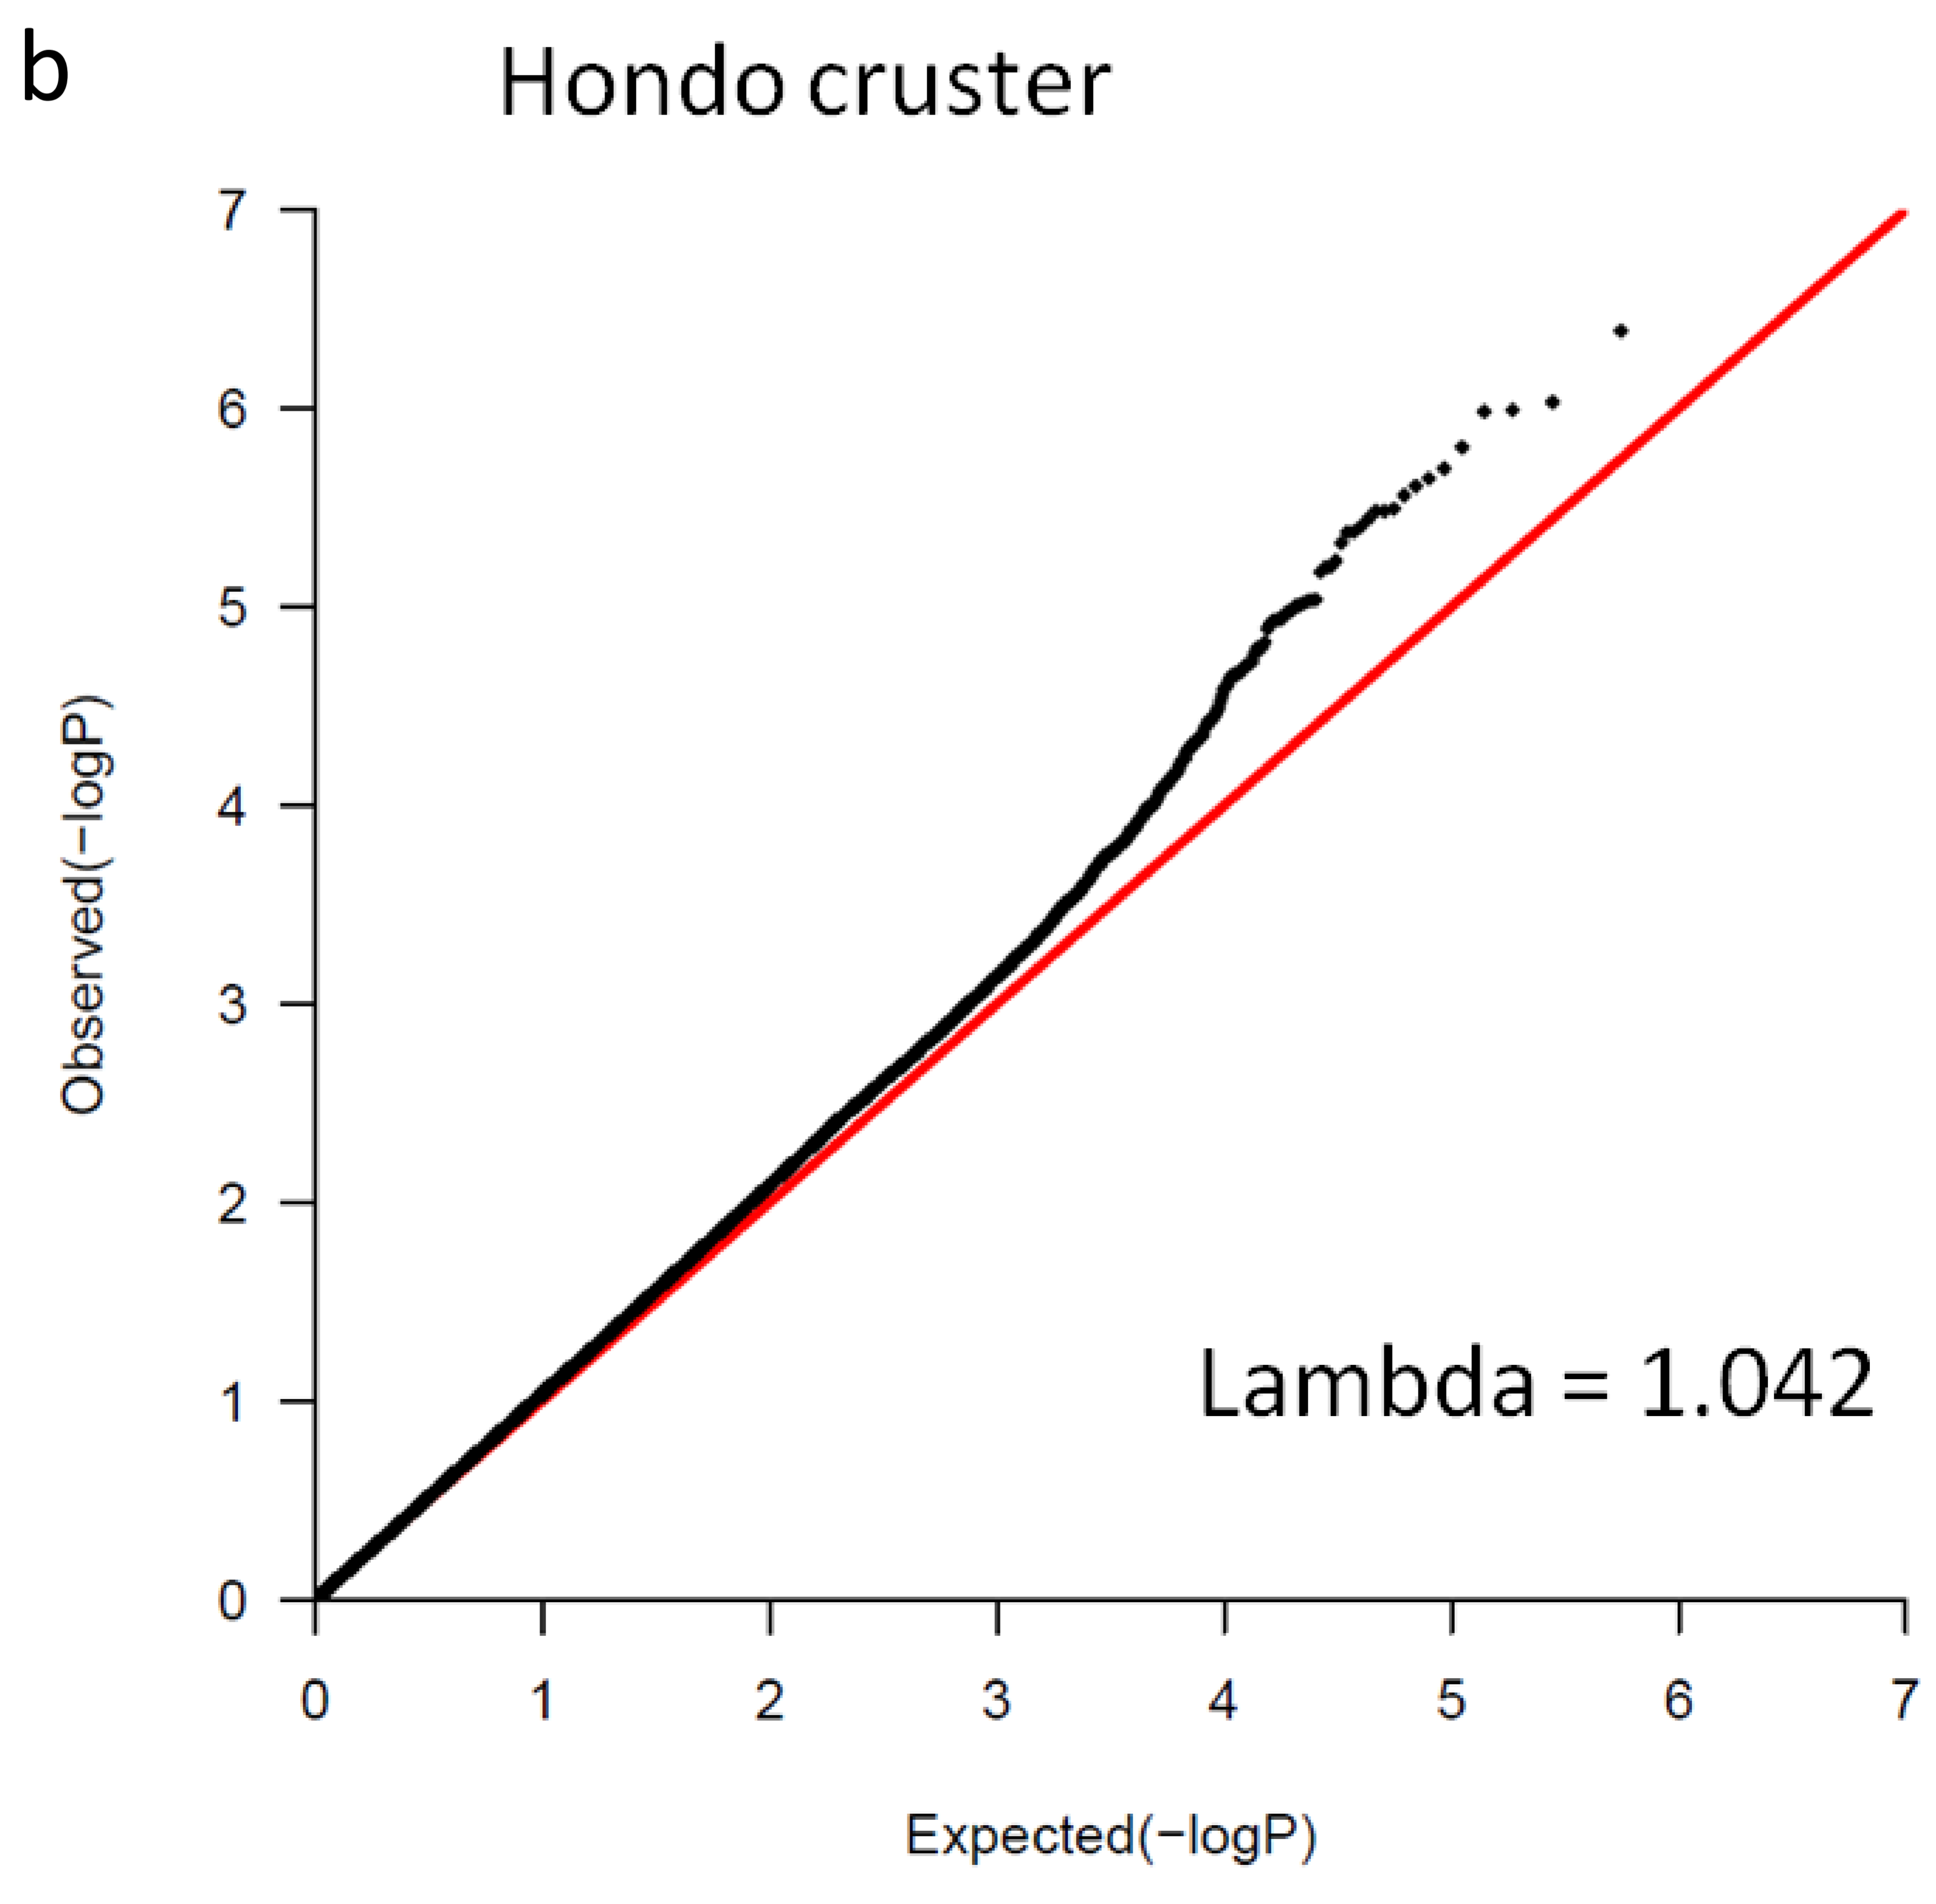

C

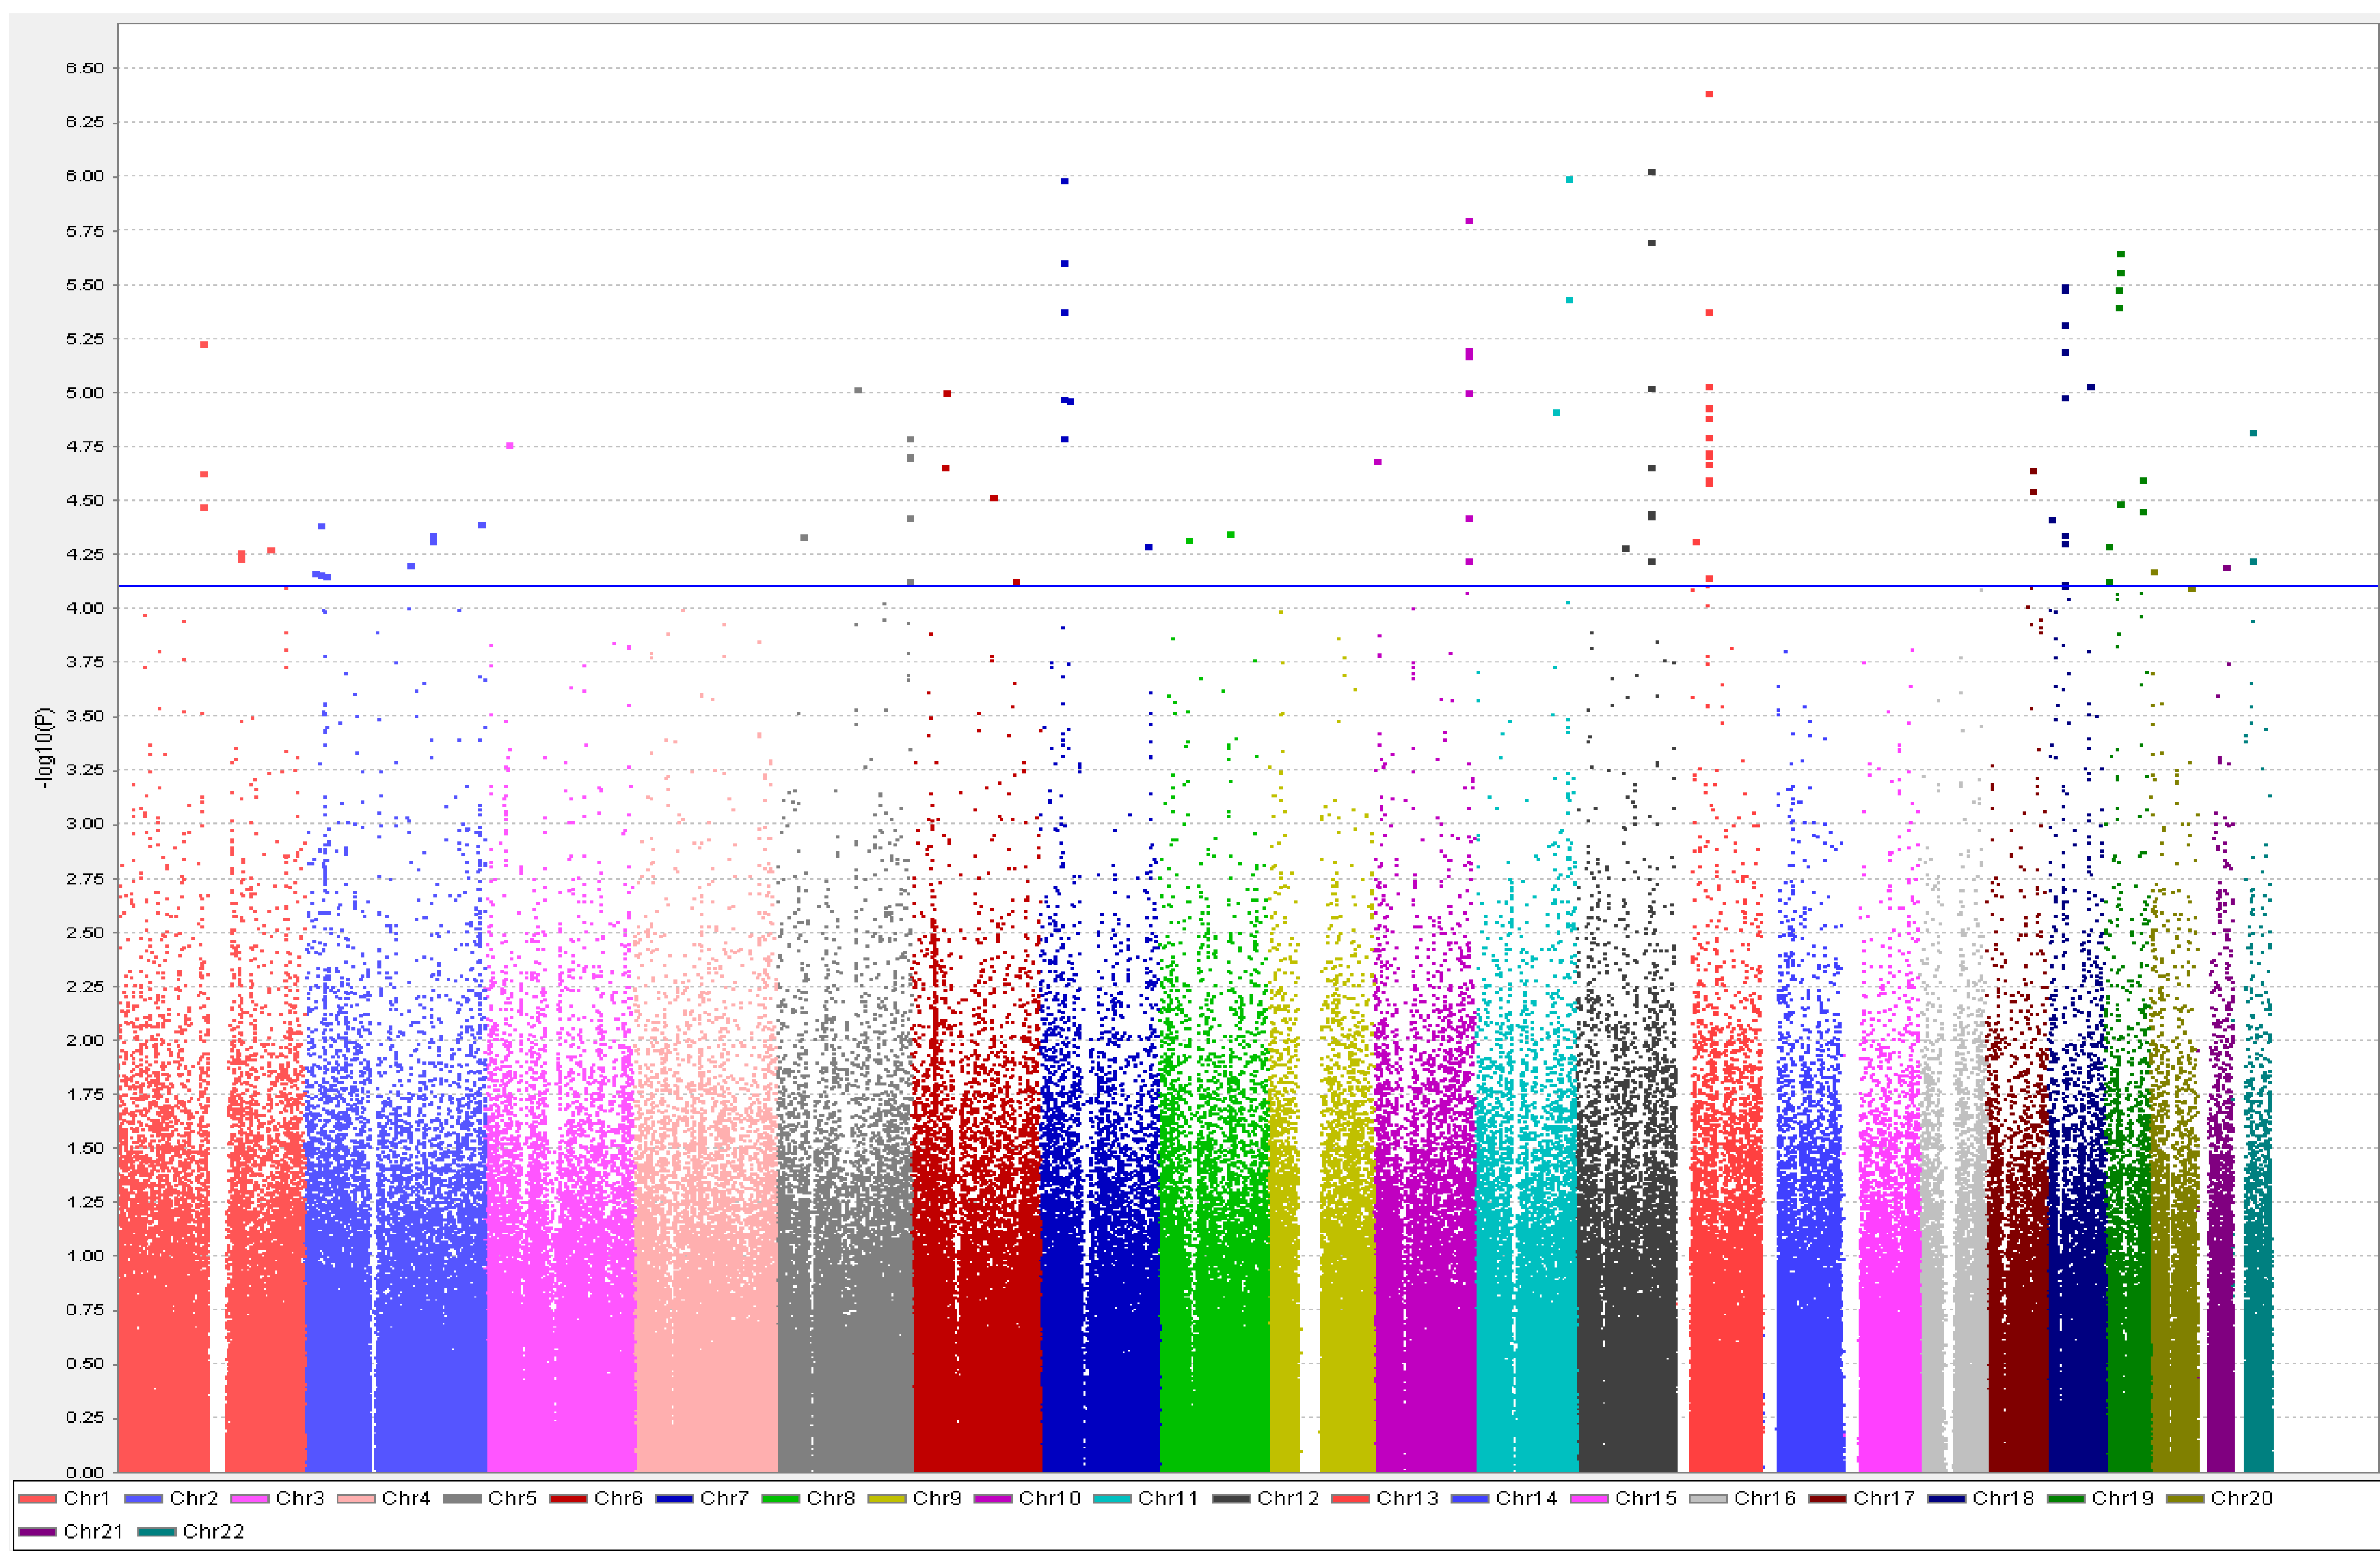

Supplement: pgen.1002541.s004.pdf [file pgen.1002541.s004.pdf]
