# Supplementary material for: A Genome-Wide Association Study of Nephrolithiasis in the Japanese Population Identifies Novel Susceptible Loci at 5q35.3, 7p14.3, and 13q14.1
Source: PubMed Central journal article supplement (PMC3291538; doi:10.1371/journal.pgen.1002541), 2012-03-01
Supplement: pgen.1002541.s005.pdf [file pgen.1002541.s005.pdf]

**a** rs11746443

OR(95%CI)

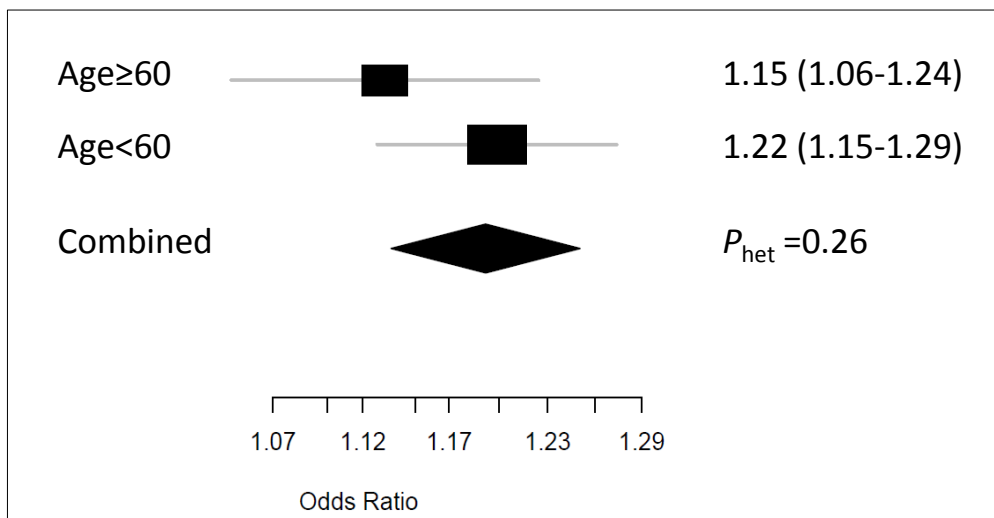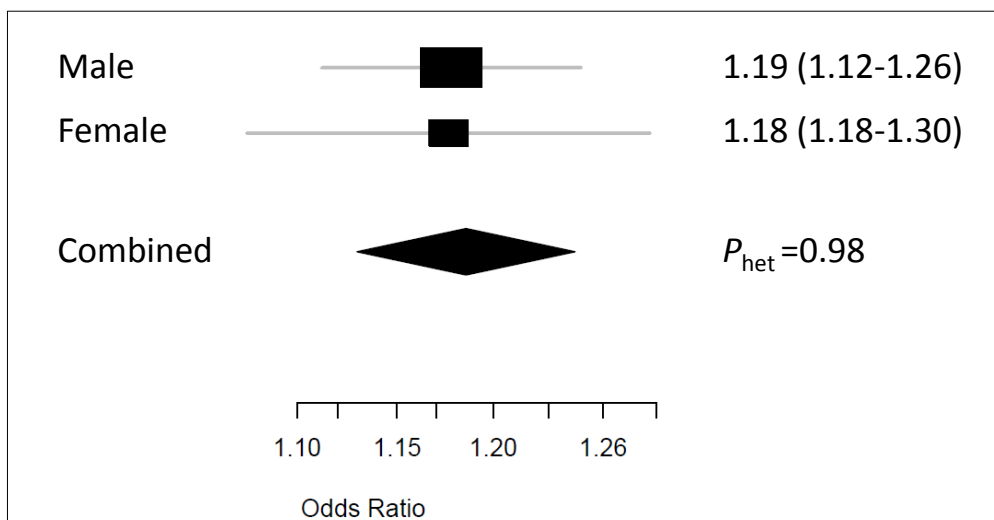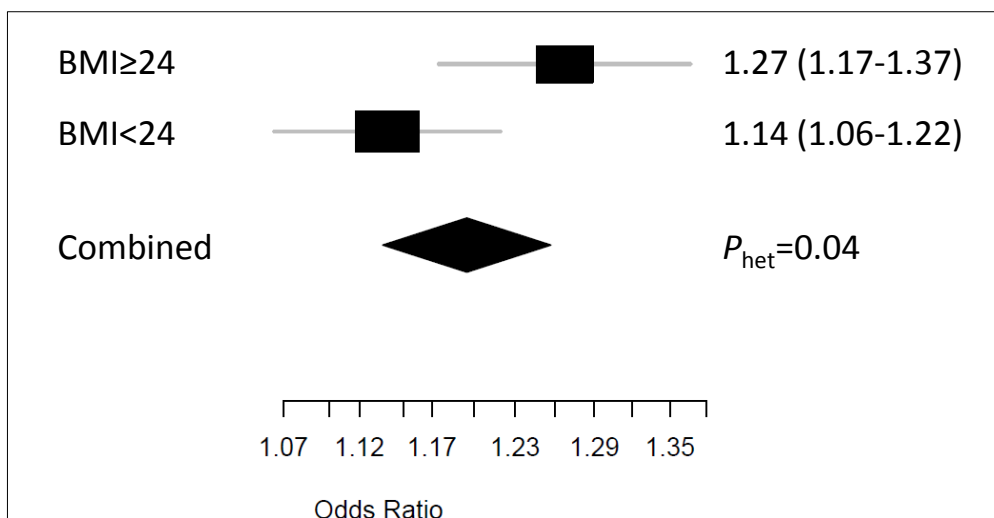

**b rs1000597**

OR(95%CI)

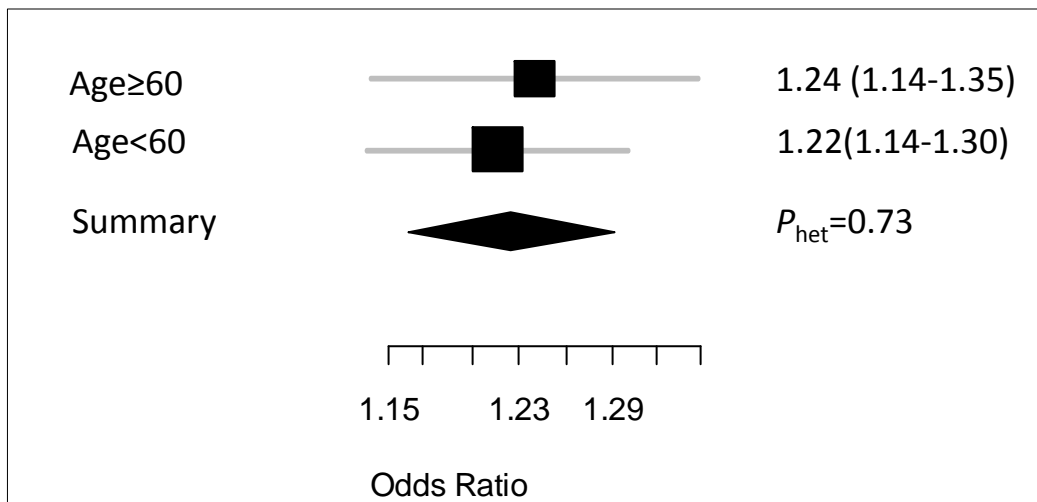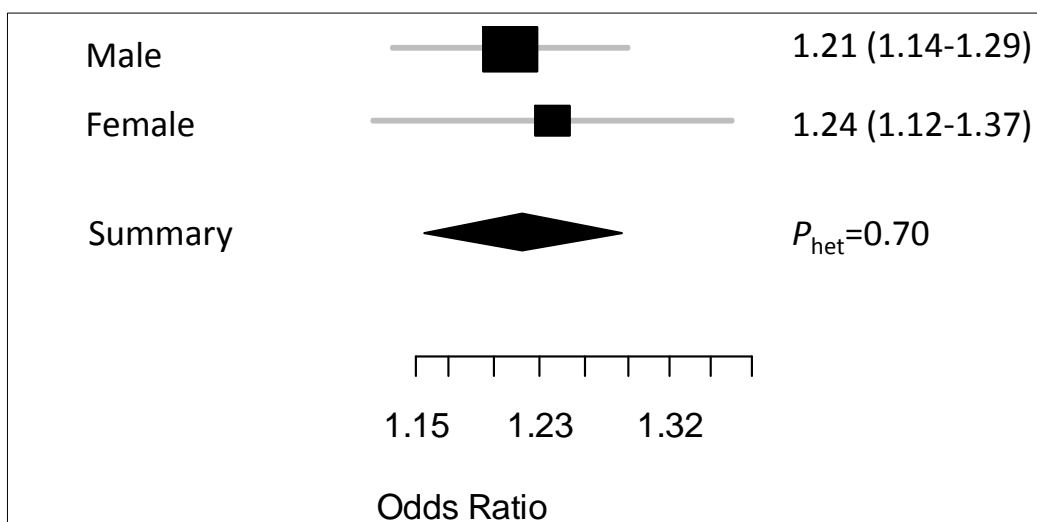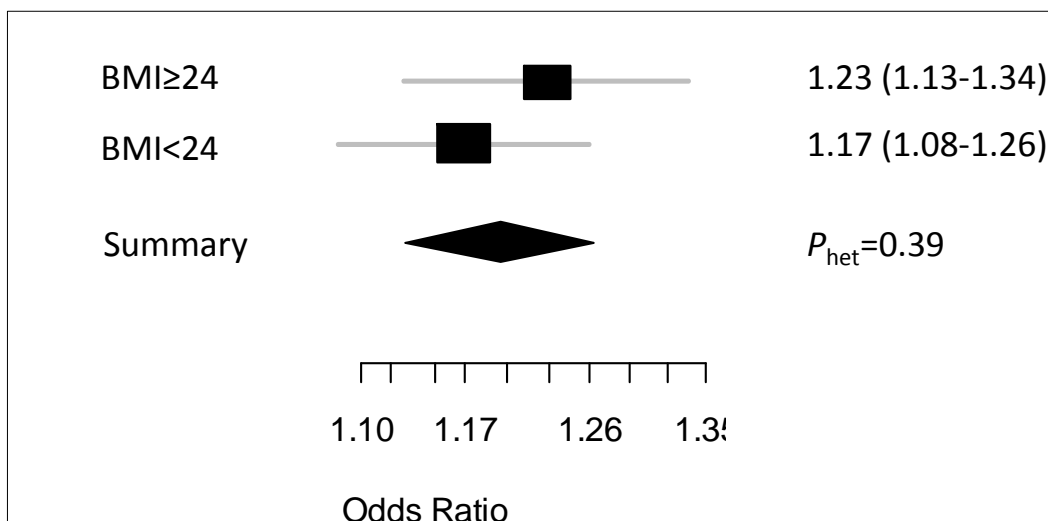

**c rs4142110**

OR(95%CI)

Age $\geq$ 60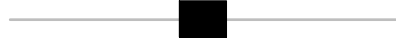

1.12 (1.05-1.20)

Age&lt;60

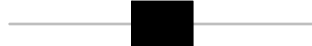

1.15 (1.08-1.21)

Summary

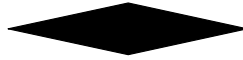 $P_{\text{het}}=0.65$ 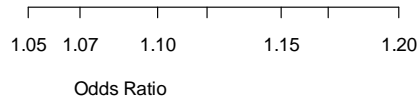

Odds Ratio

Male

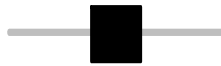

1.13 (1.07-1.19)

Female

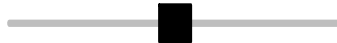

1.15 (1.06-1.25)

Summary

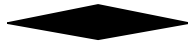 $P_{\text{het}}=0.65$ 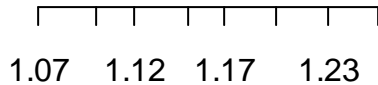

Odds Ratio

BMI $\geq$ 24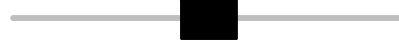

1.16 (1.08-1.24)

BMI&lt;24

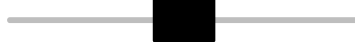

1.14 (1.08-1.22)

Summary

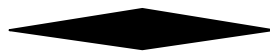 $P_{\text{het}}=0.83$ 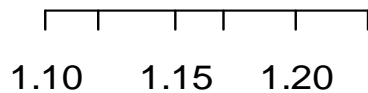

Odds Ratio
